# Supplementary material for: Synthesis, solution-processed thin film transistors and solid solutions of silylethynylated diazatetracenes
Source: Royal Society of Chemistry journal article supplement (doi:10.1039/c4cc04627g), 2014-07-11
Supplement: c4cc04627g1.pdf [file c4cc04627g1.pdf]

**Supporting Information for:**

**Synthesis, Solution-Processed Thin Film Transistors and Solid Solutions of  
Silylethynylated Diazatetracenes**

Xiaomin Xu,<sup>1</sup> Bowen Shan,<sup>1</sup> Sergii Kalytchuk,<sup>2</sup> Minghua Xie,<sup>1</sup> Shuaijun Yang,<sup>1</sup> Danqing  
Liu,<sup>1</sup> Stephen V. Kershaw,<sup>2</sup> Qian Miao\*<sup>1,3</sup>

<sup>1</sup>*Department of Chemistry, the Chinese University of Hong Kong, Shatin,  
New Territories, Hong Kong, China*

<sup>2</sup>*Department of Physics and Materials Science and Centre for Functional Photonics (CFP),  
City University of Hong Kong, Hong Kong, China*

<sup>3</sup>*Center of Novel Functional Molecules, the Chinese University of Hong Kong, Shatin,  
New Territories, Hong Kong, China*

**Table of Contents**

1. Synthesis and reactions
2. Characterization of **1a**, **1b** and **2**
  - UV-vis absorption spectroscopy
  - Cyclic voltammetry
3. Characterization of the solid solutions
  - X-ray crystallography
  - XRD pattern of the solid solution powders
  - Differential scanning calorimetry (DSC) thermograms and the melting points
4. Fabrication and characterization of solution processed thin films and transistors
  - Thin film formation and fabrication of OTFTs
  - Characterization of the thin films deposited from pristine **1a**, **1b** and **2**
  - Characterization of the thin films deposited from mixed solutions
  - Electrical Characterization of Thin Film Transistors
5. Photoluminescence
6. NMR Spectra

## 1. Synthesis and Reactions

**General:** The reagents and starting materials employed were commercially available and used without any further purification if not specified elsewhere. Anhydrous and oxygen-free THF was purified by an Advanced Technology Pure-Solv PS-MD-4 system.  $^1\text{H}$  NMR (400 MHz) or  $^{13}\text{C}$  NMR (100 MHz) spectra were recorded on a Bruker ADVANCE III spectrometer. Mass spectra were recorded on a Thermo Finnigan MAT 95 XL spectrometer. X-ray crystallography data were collected on a Bruker AXS Kappa ApexII Duo Diffractometer. Melting points were measured using a Nikon Polarizing Microscope ECLIPSE 50i POL equipped with an INTEC HCS302 heating stage without calibration.

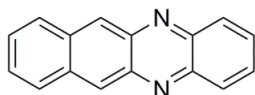

**Benzo[b]phenazine** was synthesized following the reported procedure.<sup>1</sup>

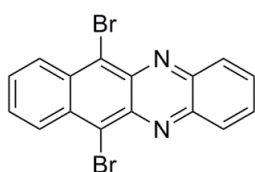

### 6, 11-dibromobenzo[b]phenazine

1.15g (5mmol) of benzo[b]phenazine was dissolved in 200 ml of chloroform at 0 °C. To the orange solution was added 0.52 ml (10 mmol) of  $\text{Br}_2$  slowly. The resulting dark solution was allowed to warm to room temperature, and then stirred for 3 hours. The solution was then washed with an aqueous  $\text{Na}_2\text{SO}_3$  solution, dried over anhydrous  $\text{Na}_2\text{SO}_4$ , and concentrated under reduced pressure. The crude product was purified by column chromatography using  $\text{CH}_2\text{Cl}_2$ /hexane (V/V=1:3) as the eluent yielding 6,11-dibromo-benzo[b]phenazine as dark purple solids (66%). Melting point: 254.6-255.8 °C.  $^1\text{H}$  NMR ( $\text{CDCl}_3$ )  $\delta$  (ppm): 8.75-8.73 (dd, 2H,  $J_1=3.2\text{Hz}$ ,  $J_2=6.7\text{Hz}$ ), 8.41-8.38 (dd, 2H,  $J_1=3.6\text{Hz}$ ,  $J_2=6.7\text{Hz}$ ), 7.91-7.89 (dd, 2H,  $J_1=3.2\text{Hz}$ ,  $J_2=7.2\text{Hz}$ ), 7.72-7.69 (dd, 2H,  $J_1=3.2\text{Hz}$ ,  $J_2=7.2\text{Hz}$ ).  $^{13}\text{C}$  NMR ( $\text{CDCl}_3$ )  $\delta$  (ppm): 145.0, 137.9, 133.7, 132.1, 130.0, 128.8, 128.6, 124.9. HRMS ( $\text{EI}^+$ ) calcd. for  $\text{C}_{16}\text{H}_8\text{Br}_2\text{N}_2$  ( $[\text{M}]^+$ ): 387.9028, found: 387.9021.

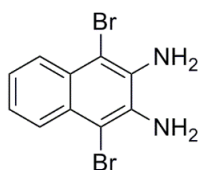

**1, 4-dibromonaphthalene-2, 3-diamine** was synthesized following the reported procedure.<sup>2</sup>

1. S. Miao, S. M. Brombosz, P. v. R. Schleyer, J. I. Wu, S. Barlow, S. R. Marder, K. I. Hardcastle, U. H. F. Bunz, *J. Am. Chem. Soc.*, 2008, **130**, 7339–7344.
2. P. Wei, L. Duan, D. Zhang, J. Qiao, L. Wang, R. Wang, G. Dong, Y. Qiu, *J. Mater. Chem.*, 2008, **18**, 806–818.

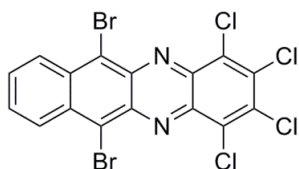

### 6, 11-dibromo-1, 2, 3, 4-tetrachlorobenzo[b]phenazine

A mixture of 316 mg (1 mmol, 1 eq) of 1,4-dibromonaphthalene-2,3-diamine and 246 mg (1 mmol, 1 eq) of 3,4,5,6-tetrachloro-*o*-benzoquinone in 8 mL of chloroform, 8 mL of ethanol and 5 mL of acetic acid was refluxed overnight. The dark purple suspension was then cooled to room temperature and concentrated under reduced pressure. The resulting crude powder was suspended in ethanol (30 mL), filtered and washed with ethanol. 423 mg (80 %) of 6,11-dibromo-1,2,3,4-tetrachlorobenzo[b]phenazine was collected as dark purple powders. Melting point: 349-352 °C. <sup>1</sup>H NMR (C<sub>2</sub>D<sub>2</sub>Cl<sub>4</sub>, recorded at 383K) δ (ppm): 8.83-8.81 (dd, 2H, *J*<sub>1</sub>=3.2Hz, *J*<sub>2</sub>=6.9Hz), 7.81-7.79 (dd, 2H, *J*<sub>1</sub>=3.1Hz, *J*<sub>2</sub>=6.9Hz). <sup>13</sup>C NMR was not recorded due to poor solubility. HRMS (EI<sup>+</sup>) calcd. for C<sub>16</sub>H<sub>4</sub>Cl<sub>4</sub>Br<sub>2</sub>N<sub>2</sub> ([M]<sup>+</sup>): 525.7442, found: 525.7447.

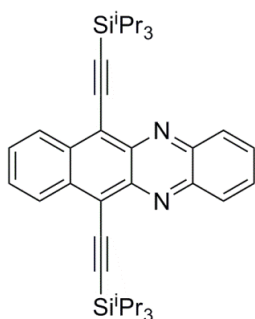

### 6, 11-bis((triisopropylsilyl)ethynyl)benzo[b]phenazine (1a)

Under an atmosphere of N<sub>2</sub>, a mixture of 6, 11-dibromobenzo[b]phenazine (76.8 mg, 0.2 mmol), CuI (15 mg, 0.08 mmol), Pd(PPh<sub>3</sub>)<sub>4</sub> (25 mg, 0.02 mmol) was dissolved in 5 ml of anhydrous and oxygen-free THF and 5 ml of diisopropylamine. Then (triisopropylsilyl) acetylene (0.18ml, 0.8mmol) was added to the solution. The reaction mixture was heated to reflux overnight under the same atmosphere of N<sub>2</sub>. After cooled to room temperature, the mixture was filtered through a short pad of celite, and the filtrate was concentrated under reduced pressure. The residue was purified by column chromatography using CH<sub>2</sub>Cl<sub>2</sub>/hexane (V/V=1:4) as the eluent, yielding 104 mg (88%) of 6,11-bis((triisopropylsilyl)ethynyl) benzo[b]phenazine (**1a**) as red solids. Melting point: 185-186 °C. <sup>1</sup>H NMR (CDCl<sub>3</sub>) δ (ppm): 8.75-8.73 (dd, 2H, *J*<sub>1</sub>=3.2Hz, *J*<sub>2</sub>=6.8Hz), 8.23-8.21 (dd, 2H, *J*<sub>1</sub>= 3.4Hz, *J*<sub>2</sub>= 6.8Hz), 7.82-7.80 (dd, 2H, *J*<sub>1</sub>= 3.2Hz, *J*<sub>2</sub>= 6.8Hz), 7.66-7.64 (dd, 2H, *J*<sub>1</sub>= 3.1Hz, *J*<sub>2</sub>= 6.8Hz), 1.33-1.32 (m, 42H, broad). <sup>13</sup>C NMR (CDCl<sub>3</sub>) δ (ppm): 144.8, 141.5, 135.4, 131.2, 130.5, 128.1, 127.8, 121.0, 108.3, 103.1, 19.1, 11.8. HRMS (ESI<sup>+</sup>) calcd. for C<sub>38</sub>H<sub>50</sub>N<sub>2</sub>Si<sub>2</sub> ([M]<sup>+</sup>): 590.3513, found: 590.3510.

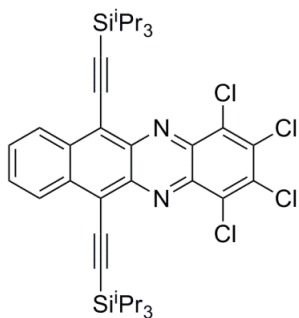

**1, 2, 3, 4-tetrachloro-6, 11-bis ((triisopropylsilyl)ethynyl)benzo[b]phenazine (1b)**

Under an atmosphere of N<sub>2</sub>, a mixture of 6, 11-dibromo-1, 2, 3, 4-tetrachlorobenzo[b]phenazine (356 mg, 0.68 mmol), CuI (12.9 mg, 0.068 mmol), Pd(PPh<sub>3</sub>)<sub>4</sub> (42.5 mg, 0.034 mmol) was dissolved in 5 ml of oxygen-free THF and 5 ml of diisopropylamine. Then 0.37 ml (1.7 mmol, 2.5 eq) of (triisopropylsilyl) acetylene was added to the solution. The reaction mixture was heated to reflux overnight under the atmosphere of N<sub>2</sub>. After cooled to room temperature, the mixture was filtered through a short pad of celite, and the filtrate was concentrated under reduced pressure. The residue was purified by column chromatography using CH<sub>2</sub>Cl<sub>2</sub>/hexane (V/V=1:6) as the eluent, yielding 397 mg (80%) of 1,2,3,4-tetrachloro-6,11-bis((triisopropylsilyl)ethynyl)benzo[b]phenazine (**1b**) as dark blue solids. Melting point: 179.5 °C (measured by differential scanning calorimetry). <sup>1</sup>H-NMR (CDCl<sub>3</sub>) δ(ppm): 8.79-8.77 (dd, 2H, J<sub>1</sub>= 3.2 Hz, J<sub>2</sub>= 6.8 Hz), 7.73-7.70 (dd, 2H, J<sub>1</sub>= 3.2 Hz, J<sub>2</sub>= 6.8 Hz), 1.29-1.27 (m, 42H, broad). <sup>13</sup>C NMR (CDCl<sub>3</sub>) δ (ppm): 140.7, 139.4, 136.7, 134.7, 132.4, 129.2, 128.0, 121.5, 109.8, 102.0, 19.1, 11.7. HRMS (ESI<sup>+</sup>) cald. for C<sub>38</sub>H<sub>47</sub>Cl<sub>4</sub>N<sub>2</sub>Si<sub>2</sub> ([M+H]<sup>+</sup>): 729.2004, found: 729.1999.

Note: It was reported that **1b** melted with decomposition at 179 °C.<sup>3</sup> However, as confirmed by <sup>1</sup>H NMR spectrum from a solution of the melt, **1b** does not change when melting at 179.5 °C although it shows an unusually wide peak for melting in the DSC heating trace.

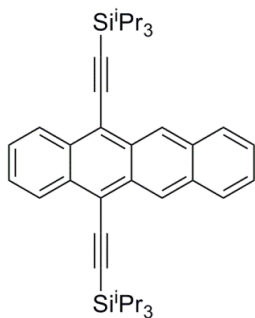

**5,12-bis((triisopropylsilyl)ethynyl)tetracene (2)** was synthesized following the reported procedure.<sup>4</sup>

3. A. L. Appleton, S. M. Brombosz, S. Barlow, J. S. Sears, J. L. Brédas, S. R. Marder, U. H. F. Bunz, *Nat. Commun.*, 2010, **1**, Article 91.
4. S. A. Odom, S. R. Parkin, J. E. Anthony, *Org. Lett.*, 2003, **5**, 4245–4248.

## 2. Characterization of 1a, 1b and 2

### (1) UV-vis Absorption Spectroscopy

The solution UV-vis spectra were recorded on a Varian CARY 1E UV-vis spectrophotometer.

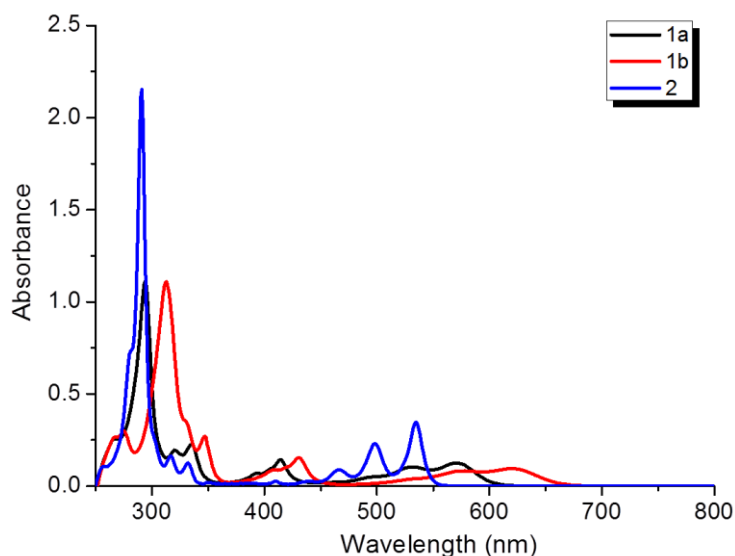

**Figure S1** UV-vis spectra of **1a**, **1b** and **2** from solutions in dichloromethane ( $1 \times 10^{-5}$  M).

### (2) Cyclic Voltammetry

The cyclic voltammetry was performed in a solution of anhydrous  $\text{CH}_2\text{Cl}_2$  with 0.1 M tetrabutylammonium hexafluorophosphate ( $\text{Bu}_4\text{NPF}_6$ ) as supporting electrolyte, at a scan rate of 50mV/s. A platinum bead was used as a working electrode, a platinum wire was used as an auxiliary electrode, and a silver wire was used as a pseudo-reference. Ferrocene/ferrocenium was used as an internal standard, and potentials were recorded versus  $\text{FeCp}_2^+/\text{FeCp}_2^0$ .

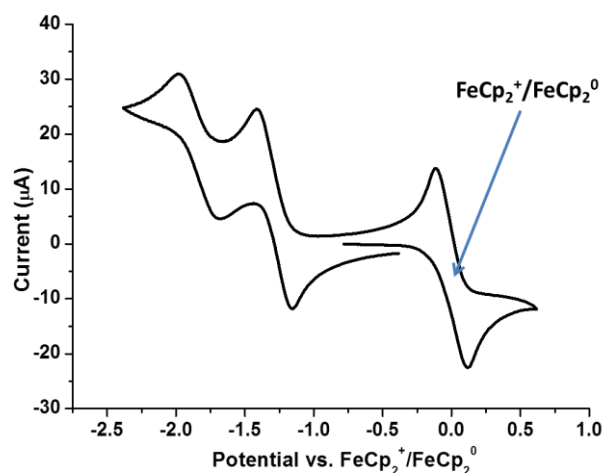

**Figure S2** Cyclic voltammogram of **1a** recorded in  $\text{CH}_2\text{Cl}_2$  with  $\text{FeCp}_2^+/\text{FeCp}_2^0$  as the internal standard.

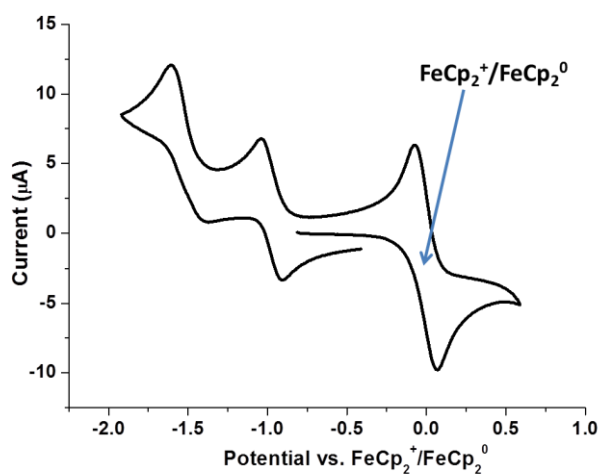

**Figure S3** Cyclic voltammogram of **1b** recorded in  $\text{CH}_2\text{Cl}_2$  with  $\text{FeCp}_2^+/\text{FeCp}_2^0$  as the internal standard.

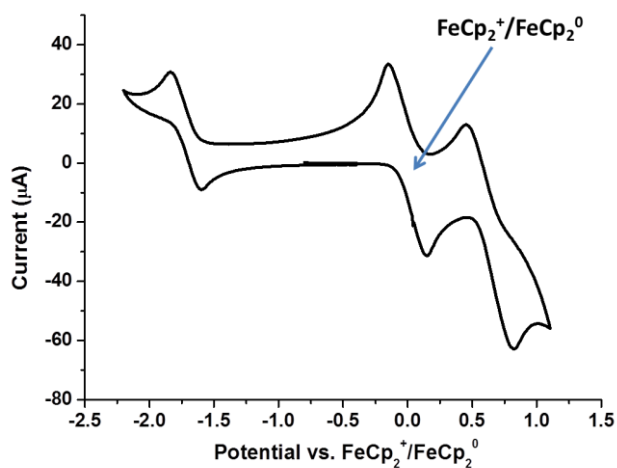

**Figure S4** Cyclic voltammogram of **2** recorded in  $\text{CH}_2\text{Cl}_2$  with  $\text{FeCp}_2^+/\text{FeCp}_2^0$  as the internal standard.

### 3. Characterization of the solid solutions

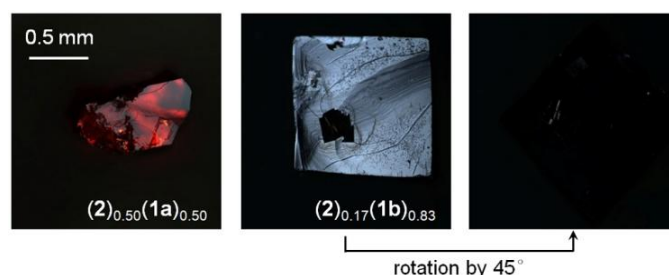

**Figure S5** Reflection polarized-light micrographs of single co-crystals

### Crystallography

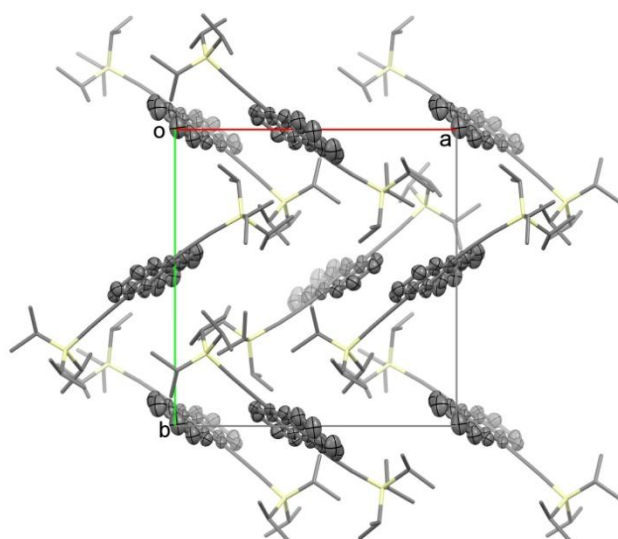

**Figure S6** Molecular packing of **2** in a unit cell. (Atoms in the tetracyclic backbone are shown as ellipsoids at 50% probability level and silylethynyl substituents are shown as capped sticks, hydrogen atoms are removed for clarification.)

**Table S1** Summary of crystallographic data of **1a**, **1b**, **2** and solid solutions of  $(\mathbf{2})_x(\mathbf{1a})_{1-x}$  and  $(\mathbf{2})_x(\mathbf{1b})_{1-x}$ .

|                                       | <b>1a</b> <sup>1</sup> only                                | <b>1b</b> only                                            | <b>2</b> only                                           | $(\mathbf{2})_{0.61}(\mathbf{1a})_{0.39}$               | $(\mathbf{2})_{0.19}(\mathbf{1b})_{0.81}$                 | $(\mathbf{2})_{0.14}(\mathbf{1b})_{0.86}$                 |
|---------------------------------------|------------------------------------------------------------|-----------------------------------------------------------|---------------------------------------------------------|---------------------------------------------------------|-----------------------------------------------------------|-----------------------------------------------------------|
| Space Group                           | P-1                                                        | C 2/c                                                     | P 2 <sub>1</sub> 2 <sub>1</sub> 2 <sub>1</sub>          | P 2 <sub>1</sub> 2 <sub>1</sub> 2 <sub>1</sub>          | C 2/c                                                     | C 2/c                                                     |
| Unit Cell Lengths (Å)                 | a = 7.3968<br>b = 13.8925<br>c = 18.4277                   | a = 35.551<br>b = 15.1706<br>c = 14.9907                  | a = 14.4346<br>b = 15.1821<br>c = 17.0101               | a = 14.4307<br>b = 15.1331<br>c = 16.975                | a = 35.4482<br>b = 15.1828<br>c = 14.9575                 | a = 35.3907<br>b = 15.1394<br>c = 14.9478                 |
| Unit Cell Angles (°)                  | $\alpha$ = 112.065<br>$\beta$ = 95.624<br>$\gamma$ = 90.53 | $\alpha$ = 90.00<br>$\beta$ = 104.265<br>$\gamma$ = 90.00 | $\alpha$ = 90.00<br>$\beta$ = 90.00<br>$\gamma$ = 90.00 | $\alpha$ = 90.00<br>$\beta$ = 90.00<br>$\gamma$ = 90.00 | $\alpha$ = 90.00<br>$\beta$ = 103.908<br>$\gamma$ = 90.00 | $\alpha$ = 90.00<br>$\beta$ = 104.143<br>$\gamma$ = 90.00 |
| Volume per molecule (Å <sup>3</sup> ) | 1744.3                                                     | 7835.65                                                   | 3727.72                                                 | 3707.02                                                 | 7814.16                                                   | 7766.18                                                   |
| R-factor                              | 0.1484                                                     | 0.0806                                                    | 0.0580                                                  | 0.1491                                                  | 0.0751                                                    | 0.0603                                                    |
| Packing Motif                         | 2D<br>$\pi$ -stacking                                      | 2D<br>$\pi$ -stacking                                     | herringbone                                             | herringbone                                             | 2D<br>$\pi$ -stacking                                     | 2D<br>$\pi$ -stacking                                     |

**X-ray diffraction (XRD):** XRD data were recorded on a SmartLab X-Ray Refractometer from powders, which were prepared from solution-grown crystals by grinding.

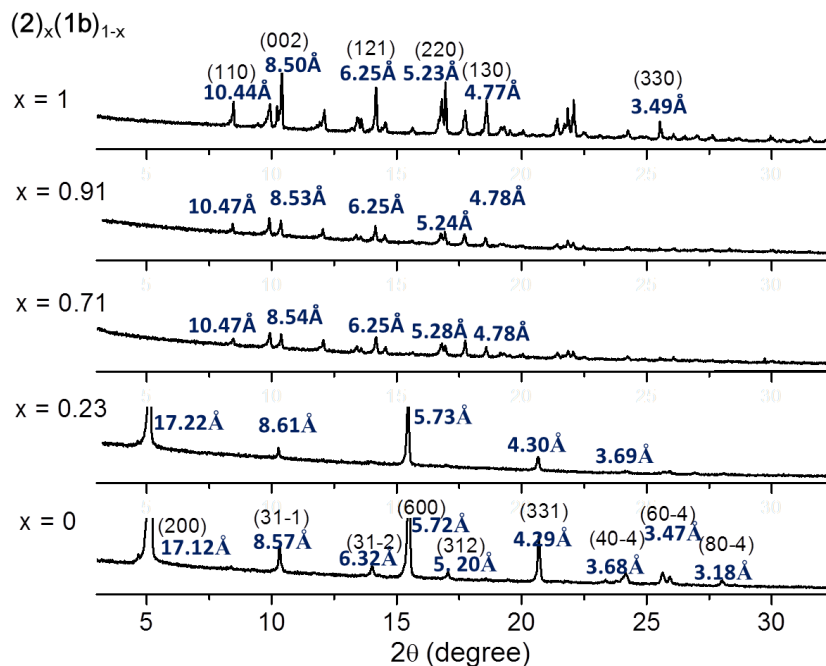

**Figure S7** X-ray diffractions from ground powders of **2**, **1b** and the solid solutions  $(2)_x(1b)_{1-x}$ .

**Differential scanning calorimetry (DSC):**

DSC data were recorded on a PERKIN ELMER DSC 6 equipment under a  $N_2$  flow.

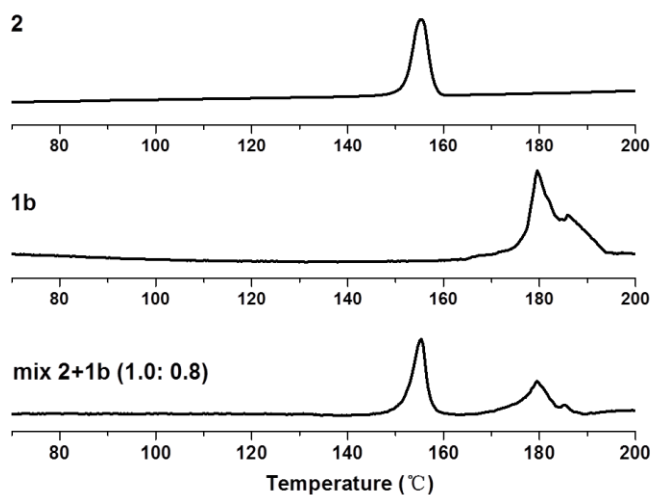

**Figure S8** DSC thermograms (heating cycle) showing **2**, **1b** and a mixture of **2** with **1b**.



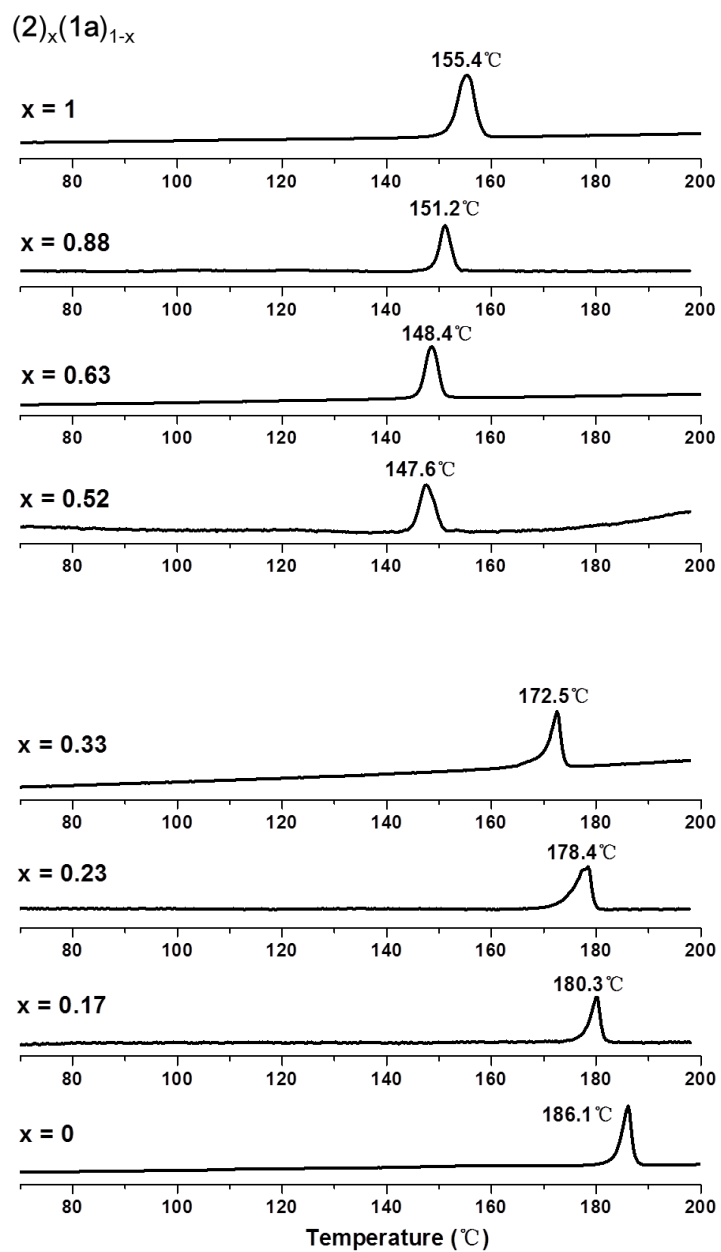

**Figure S9** DSC thermograms (heating cycle) of **2**, **1a** and the solid solutions  $(2)_x(1a)_{1-x}$  with the melting point marked for each sample.

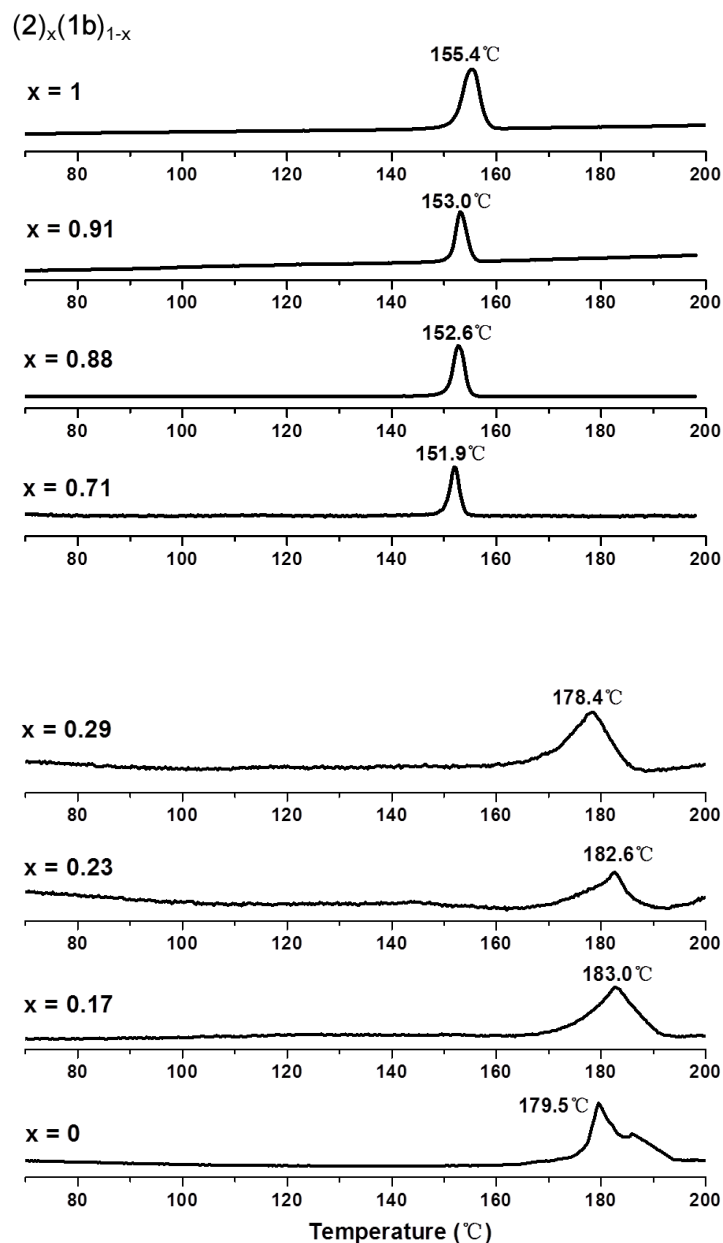

**Figure S10** DSC thermograms (heating cycle) showing **2**, **1b** and the solid solutions  $(2)_x(1b)_{1-x}$  with the melting point marked for each sample.

#### 4. Fabrication and characterization of solution-processed thin films and transistors

##### (1) Thin film formation and fabrication of OTFTs

A thin layer of  $AlO_y/TiO_x$  was spin-cast onto a highly doped silicon wafer following the reported solution-based procedure to form dielectrics.<sup>5</sup> To form SAMs of the phosphonic acids **3**, the  $AlO_y/TiO_x$ -coated Si wafer was soaked in a solution of **3** in isopropanol (0.3 mM) at room temperature for 12 hours, rinsed with isopropanol subsequently and dried with a flow

5. Y. Su, C. Wang, W. Xie, F. Xie, J. Chen, N. Zhao, J. Xu, *ACS Appl. Mater. Interfaces* 2011, **3**, 4662–4667.

of nitrogen.<sup>6</sup> Thin films of pristine **1a**, **1b**, **2** and the solid solutions of  $(\mathbf{2})_x(\mathbf{1a})_{1-x}$ ,  $(\mathbf{2})_x(\mathbf{1b})_{1-x}$  were formed by immersing the silicon substrate into a 1 mg/mL solution in dichloromethane and acetone (1:1 by volume) and then pulling it up with a constant speed of 10  $\mu\text{m/s}$ . A layer of gold was subsequently deposited by thermal evaporation under vacuum onto the films through a shadow mask to form top-contact source and drain electrodes. The resulting devices had highly doped silicon as the gate electrode and the SAM-modified  $\text{AlO}_y/\text{TiO}_x$  as dielectrics. The **3**-modified  $\text{AlO}_y/\text{TiO}_x$  has a capacitance per unit area ( $C_i$ ) of  $250 \pm 18 \text{ nF/cm}^2$  as measured at a frequency of 100 Hz from a metal-insulator-metal structure, which had vacuum-deposited gold ( $0.2 \text{ mm} \times 1 \text{ mm}$ ) as the top electrode and a highly doped silicon substrate as the bottom electrode.<sup>6</sup>

## (2) Characterization of the thin films deposited from pristine **1a**, **1b** and **2**

Reflected polarized-light micrographs were obtained using a Nikon 50IPOL microscope.

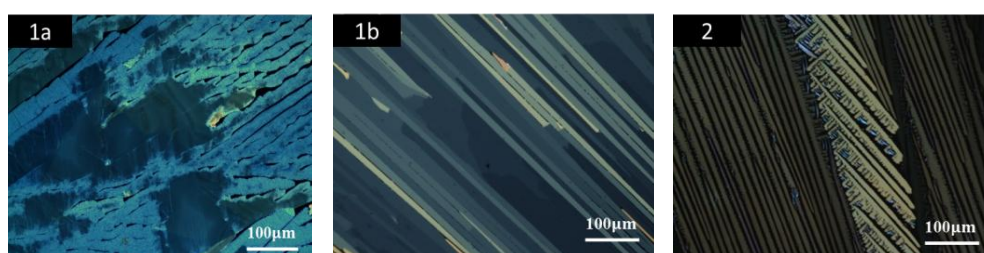

**Figure S11** Reflected polarized-light micrographs for the dip-coated films of **1a**, **1b**, and **2** from the solutions in dichloromethane and acetone (1:1) on **3**-modified  $\text{AlO}_y/\text{TiO}_x$  dielectrics.

X-ray diffractions from thin films were recorded on a SmartLab X-Ray Refractometer.

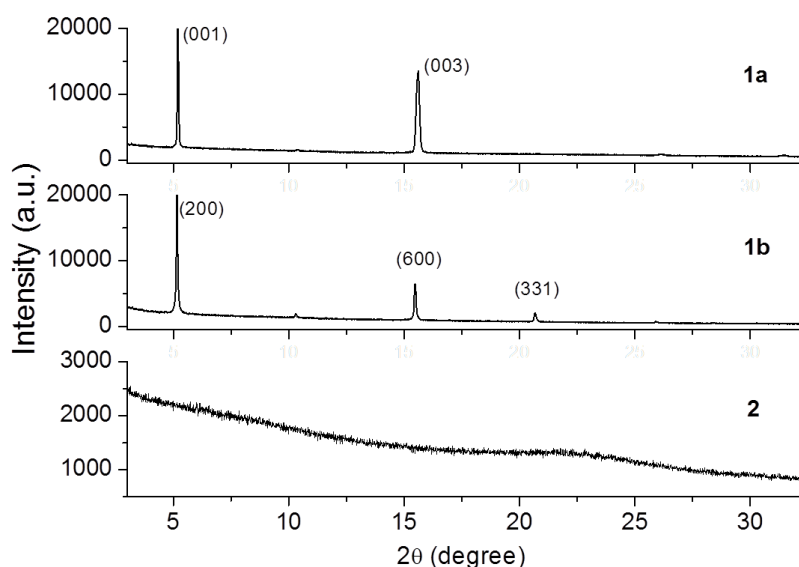

**Figure S12** X-ray diffractions of dip-coated films of **1a**, **1b** and **2** on the **3**-modified  $\text{AlO}_y/\text{TiO}_x$

6. D. Liu, X. Xu, Y. Su, Z. He, J. Xu, Q. Miao, *Angew. Chem. Int. Ed.*, 2013, **52**, 6222–6227.

### (3) Characterization of the thin films deposited from mixed solutions

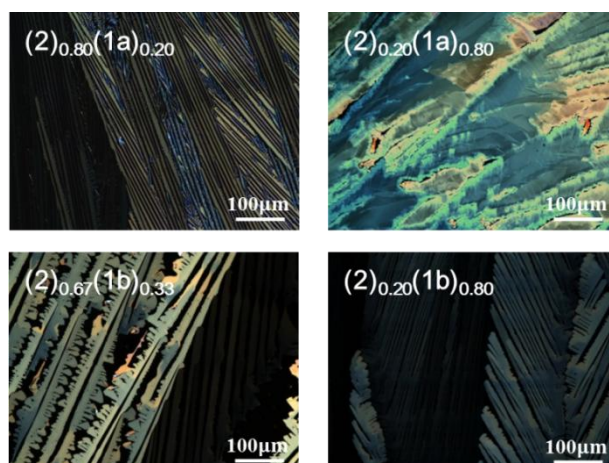

**Figure S13** Reflected polarized-light micrographs for typical dip-coated films of  $(2)_x(1a)_{1-x}$ ,  $(2)_x(1b)_{1-x}$  on the **3**-modified  $AlO_y/TiO_x$ .

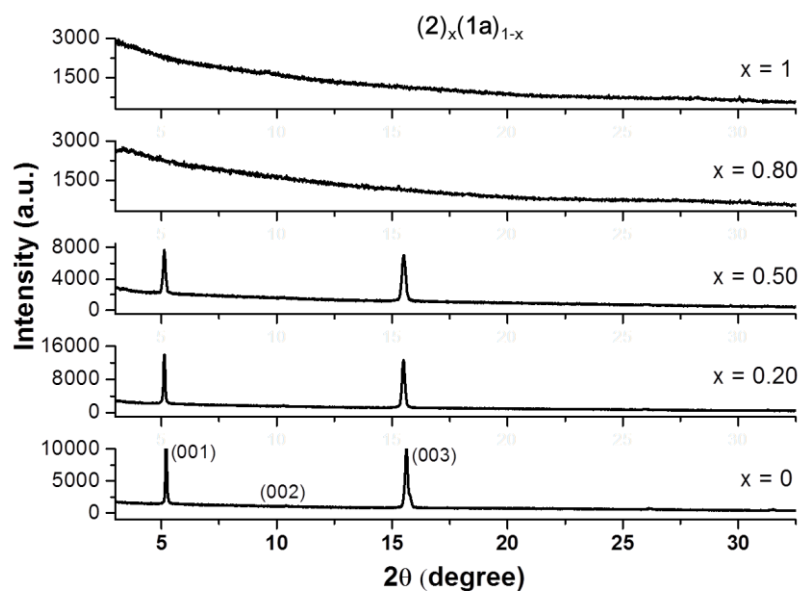

**Figure S14** X-ray diffraction patterns of dip-coated films of **2**, **1a** and  $(2)_x(1a)_{1-x}$  on the **3**-modified  $AlO_y/TiO_x$ .

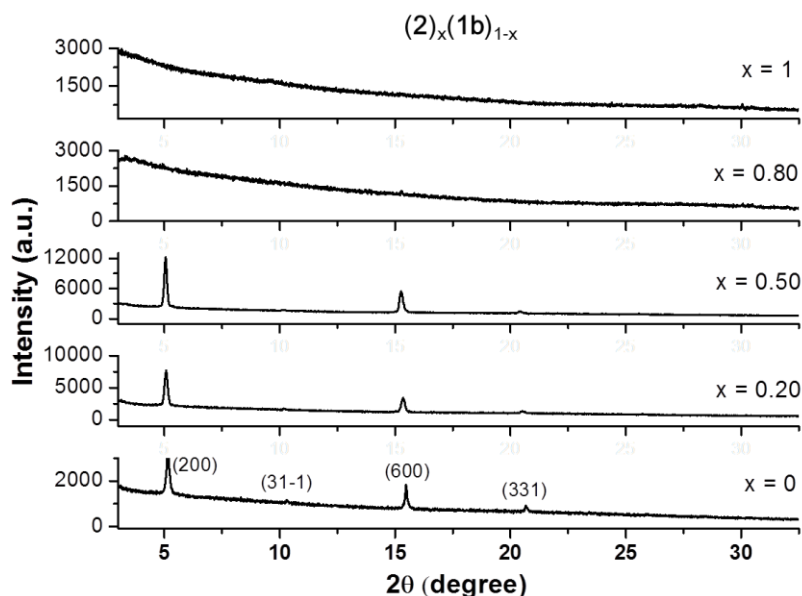

**Figure S15** X-ray diffraction patterns of dip-coated films of **2**, **1b** and  $(2)_x(1b)_{1-x}$  on the **3**-modified  $\text{AlO}_y/\text{TiO}_x$ .

#### (4) Electrical Characterization of Thin Film Transistors:

The current-voltage measurement was carried out on a JANIS ST-500-20-4TX probe station with a Keithley 4200 Semiconductor Characterization System at room temperature with a background pressure of  $1.0 \times 10^{-5}$  torr or lower if not specified elsewhere.

The field effect mobility of these OTFTs in the saturation regime were extracted from transfer I-V curves using the equation:  $I_{DS} = (\mu WC_i/2L)(V_G - V_T)^2$ , where  $I_{DS}$  is the drain current,  $\mu$  is field effect mobility,  $C_i$  ( $250 \text{ nF/cm}^2$ ) is the capacitance per unit area for the **3**-modified  $\text{AlO}_y/\text{TiO}_x$ ,  $W$  is the channel width,  $L$  is the channel length, and  $V_G$  and  $V_T$  are the gate and threshold voltage, respectively.

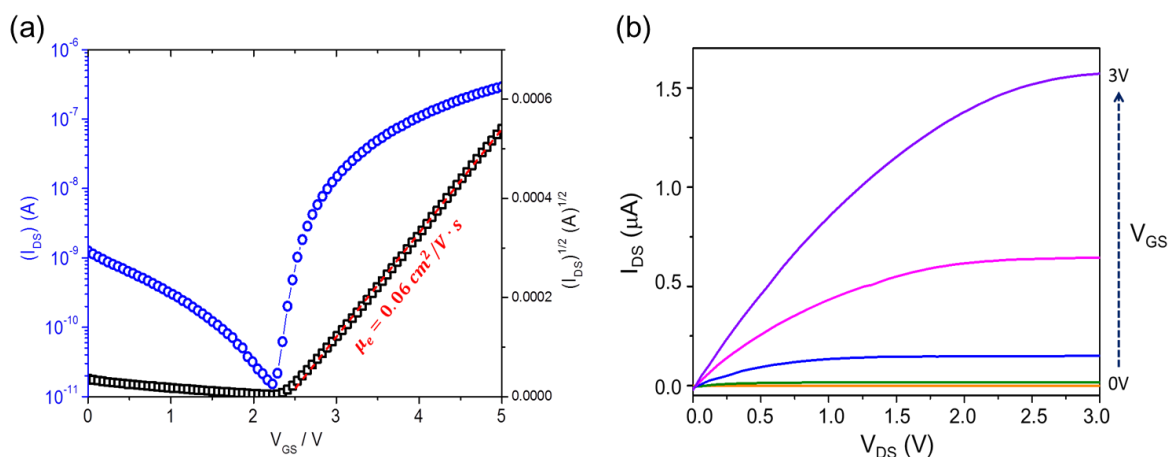

**Figure S16** (a) Drain current ( $I_{DS}$ ) versus gate voltage ( $V_G$ ) with drain voltage ( $V_{DS}$ ) at 5 V for a typical dip-coated OTFT of **1a** with an active channel of  $W = 1 \text{ mm}$  and  $L = 150 \text{ }\mu\text{m}$  as measured under vacuum showing an electron mobility of  $0.06 \text{ cm}^2/\text{Vs}$ . (b) Output I-V curves of a typical dip-coated OTFT of **1b** with an active channel of  $W = 1 \text{ mm}$  and  $L = 100 \text{ }\mu\text{m}$  as measured under vacuum.

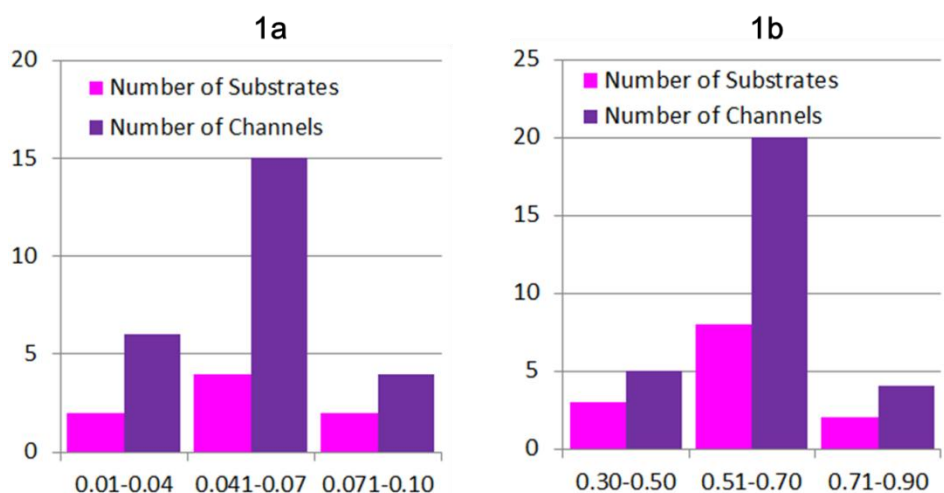

**Figure S17** The statistics of measured field-effect mobilities for solution-processed OTFTs of **1a** and **1b**.

## 5. Photoluminescence

Photoluminescence spectra were recorded on a FLS920P fluorescence spectrometer (Edinburgh Instrument) equipped with a R928P photomultiplier (Hamamatsu) with a 450 W xenon arc lamp as the excitation source. The absolute fluorescence quantum yields were determined by standard procedure using the same fluorescence spectrometer equipped with an integrating sphere with its inner face coated with BENFLEC® (Edinburgh Instrument). Spectral correction curves were provided by Edinburgh Instrument. All optical measurements were performed at room temperature under ambient conditions. The fluorescence quantum yields ( $\Phi$ ) were determined by a calibrated integrating sphere system.

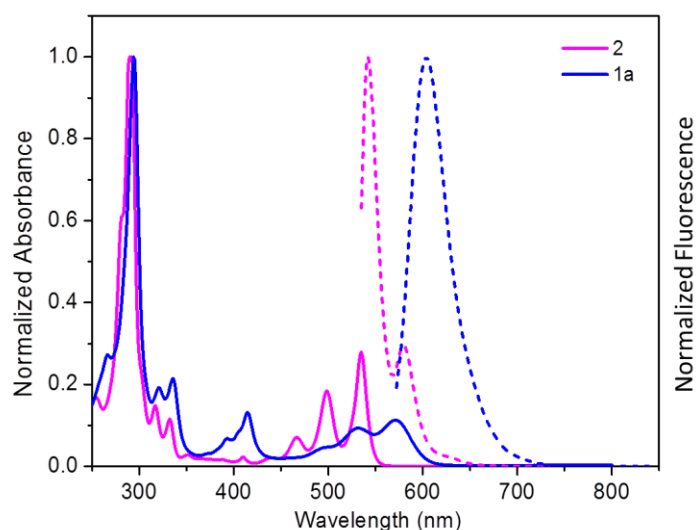

**Figure S18** Normalized UV-vis absorption (solid line) and fluorescence emission (dashed line) spectra of **2** and **1a** respectively from solutions in dichloromethane ( $1 \times 10^{-5}$  M).

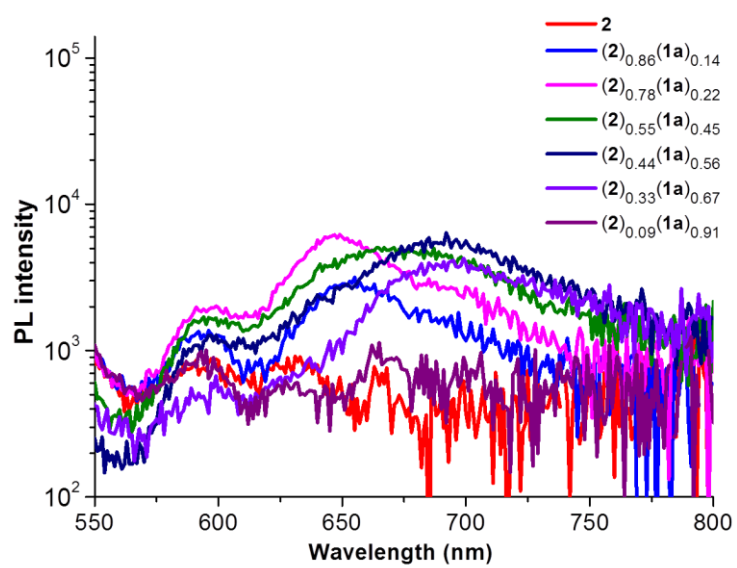

**Figure S19** Photoluminescence spectra of **2** and the solid solutions  $(\mathbf{2})_x(\mathbf{1a})_{1-x}$ , excited at the maximum excitation of **2**.

## 6. NMR Spectra

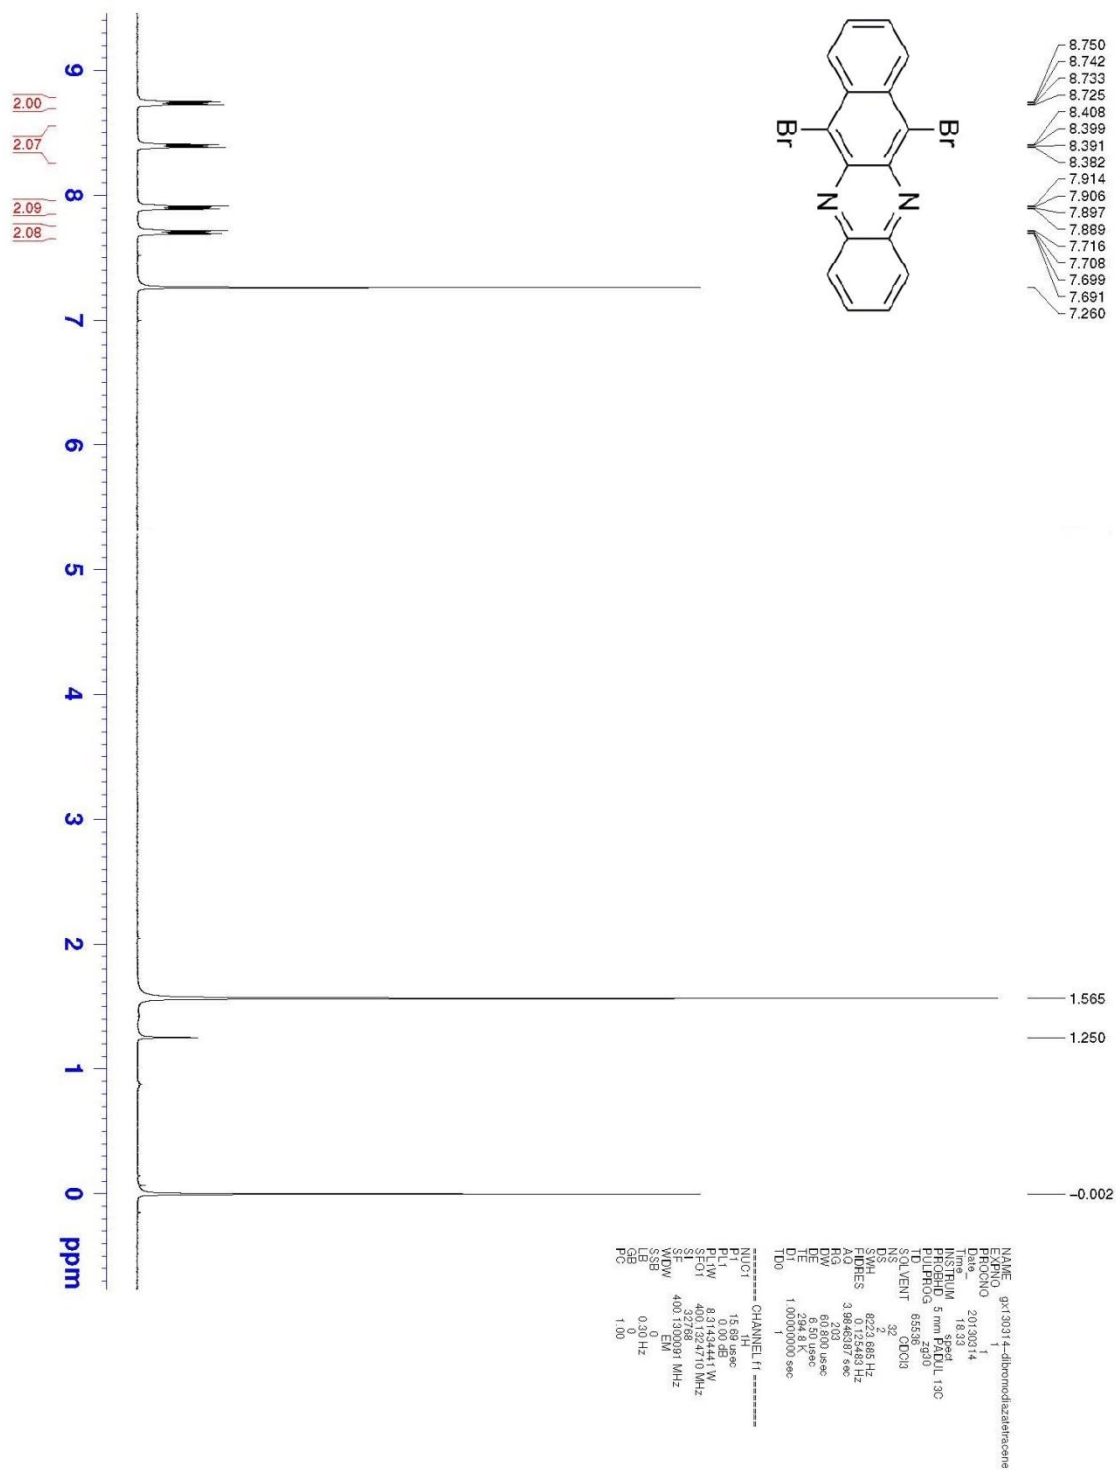

<sup>1</sup>H NMR spectrum of 6, 11-dibromobenzo[b]phenazine in CDCl<sub>3</sub>



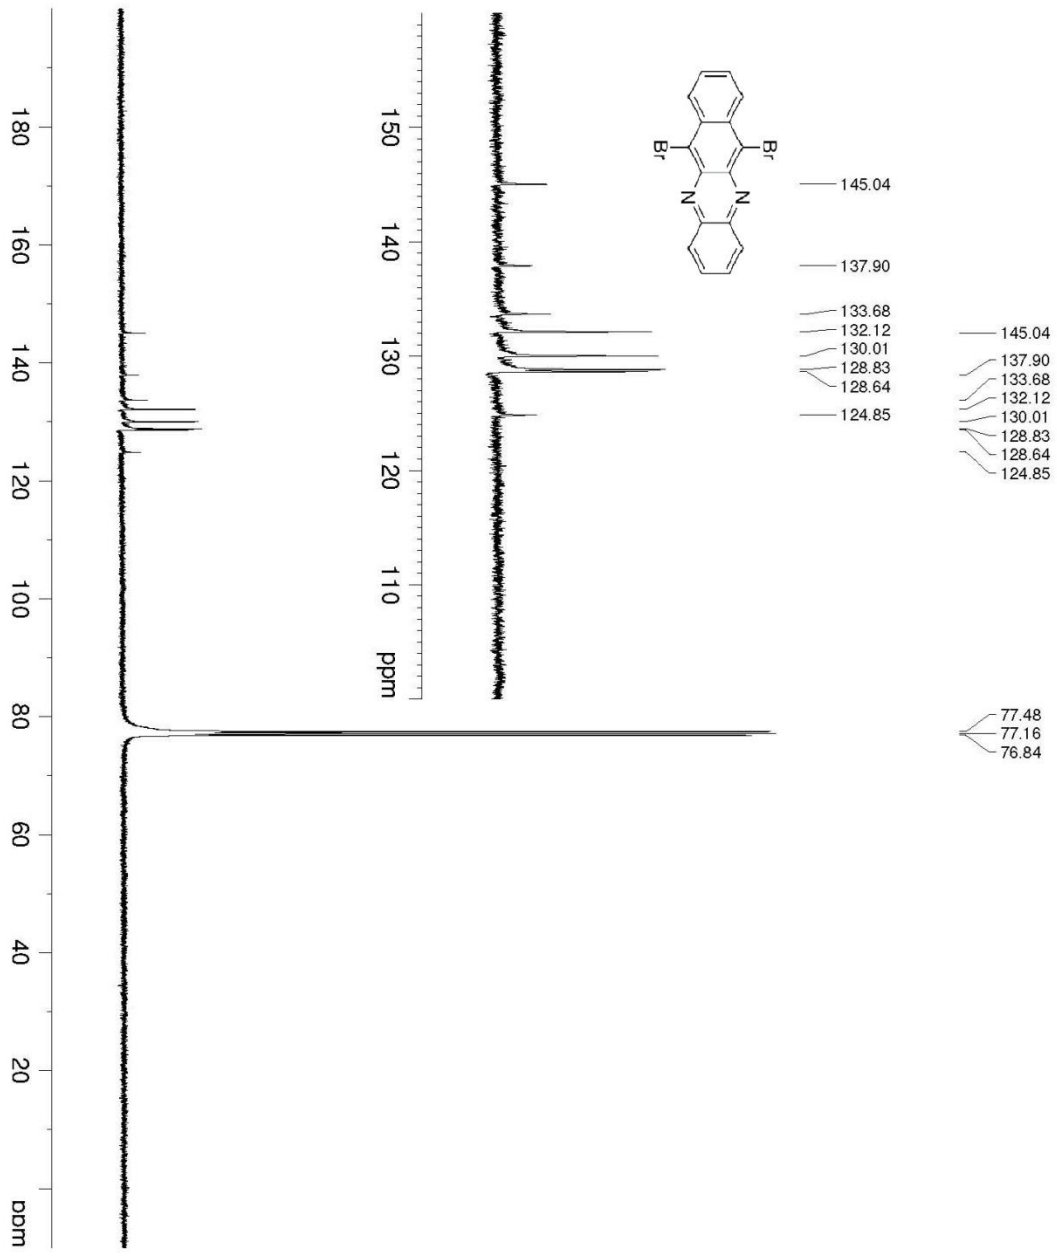

```

NAME          g130223-dibromobenzo[b]phenazine-c
EXPNO         1
Date_         2010223
Time          22.45
PULPROG       zgpg30
PCPDPRG       cpd13
SOLVENT       16088
NS            16088
SI            24003.461 Hz
SF            0.366798 Hz
AQ            1.3693468 sec
RG            20.800 usec
DW            2.0000000 sec
DE            6.50 usec
TE            2.0000000 sec
D11           0.0300000 sec
D12           1
===== CHANNEL f1 =====
NUC1          13C
P1            9.90 usec
PL1           -2.00 dB
SFO1          100.6278452 MHz
===== CHANNEL f2 =====
CPDPRG2      waltz16
NUC2          13C
P2            90.18 usec
PL2           -1.00 dB
PL12         15.16 dB
PL13         13.56647066 W
PL14         0.32848096 W
PL15W        400.3496068 MHz
SI            100.6278452 MHz
SF            100.6278452 MHz
SFO2          1.00 Hz
SFO3          1.40 Hz
PC            1.40
  
```

<sup>13</sup>C NMR spectrum of 6, 11-dibromobenzo[b]phenazine in CDCl<sub>3</sub>

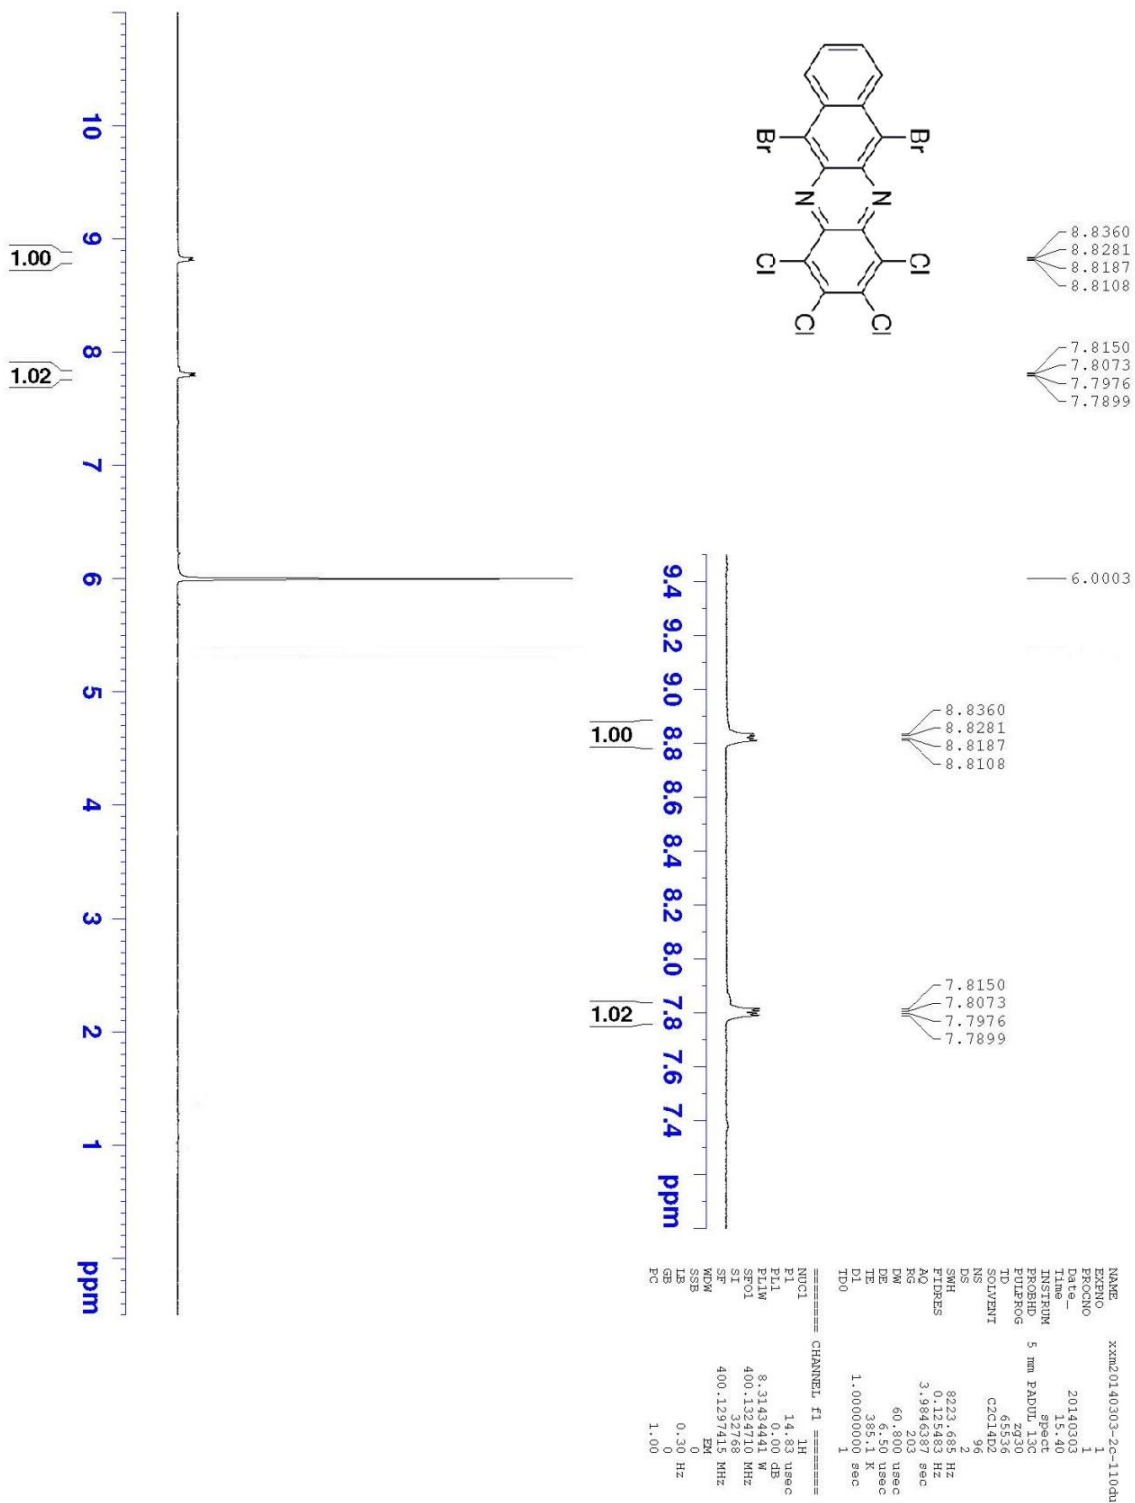

<sup>1</sup>H NMR spectrum (C<sub>2</sub>D<sub>2</sub>Cl<sub>4</sub>-d<sub>2</sub>) of 6, 11-dibromo-1, 2, 3, 4-tetrachlorobenzo[b]phenazine recorded at 383K

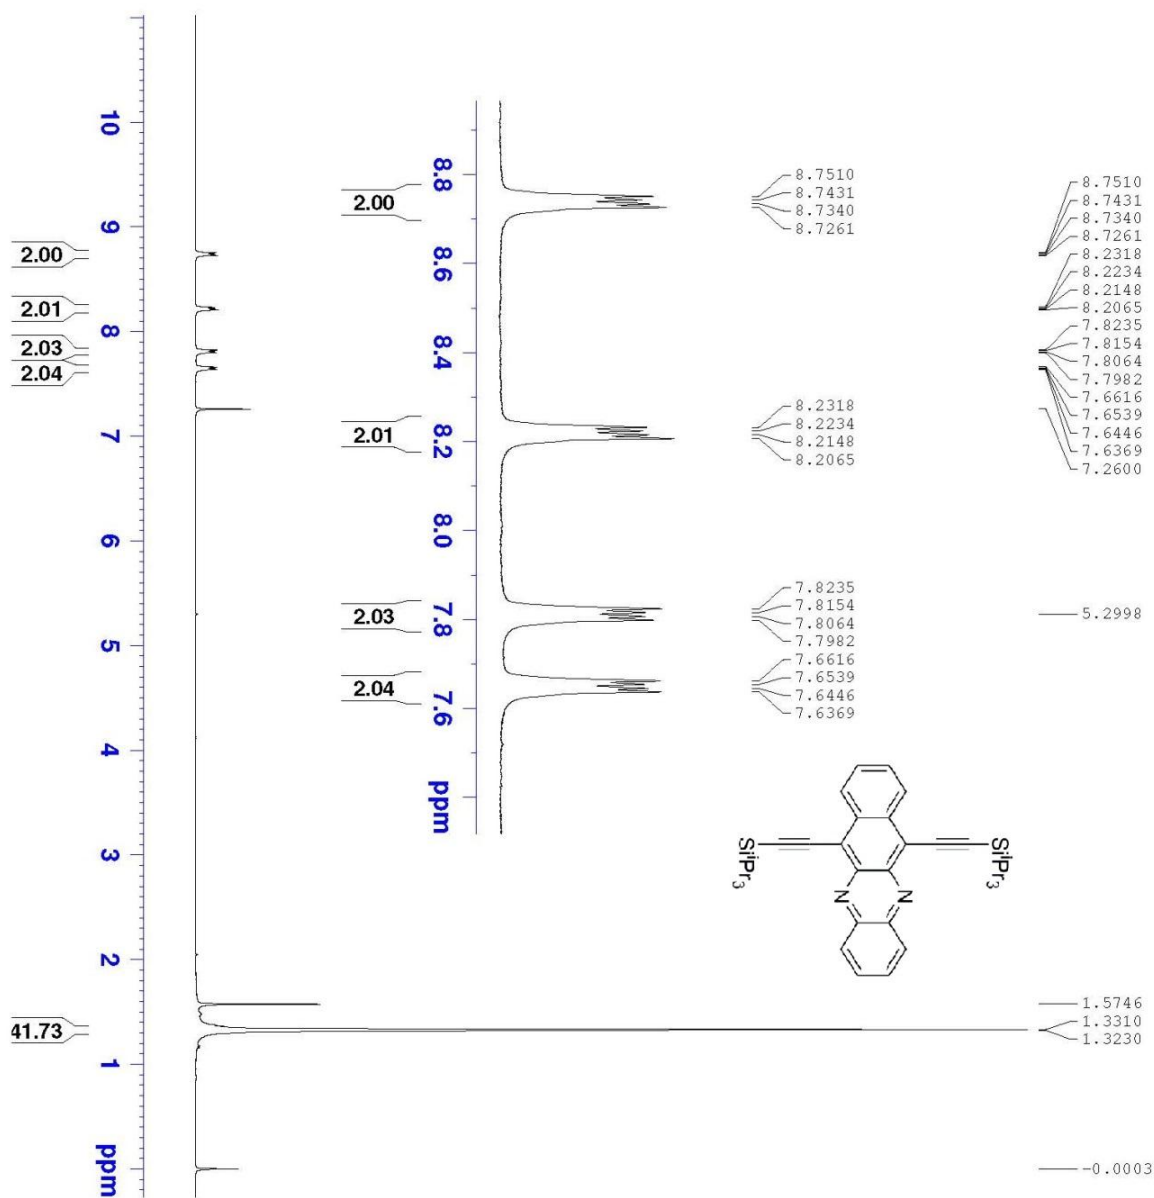

```

NAME          shw-20140227-TIPS-DAT
EXPNO         1
PROCNO        1
Date_         20140227
Time         13.48
INSTRUM       spect
PROBHD        5 mm PABUL 13C
PULPROG       zg30
TD            65536
SOLVENT       CDCl3
NS           24
DS           2
SWH          8223.685 Hz
FIDRES       0.125483 Hz
AQ           3.9846387 sec
RG           203
DW           60.800 usec
DE           6.50 usec
TE           294.7 K
D1           1.00000000 sec
TD0          1

===== CHANNEL f1 =====
NUC1          1H
P1           14.83 usec
PL1          0.00 dB
PL12         8.3143441 W
SFO1         400.1324710 MHz
SI           32768
SF           400.1300083 MHz
MAGN         EN
SSB          0
GB           0.30 Hz
PC           1.00

```

<sup>1</sup>H NMR spectrum of **1a**

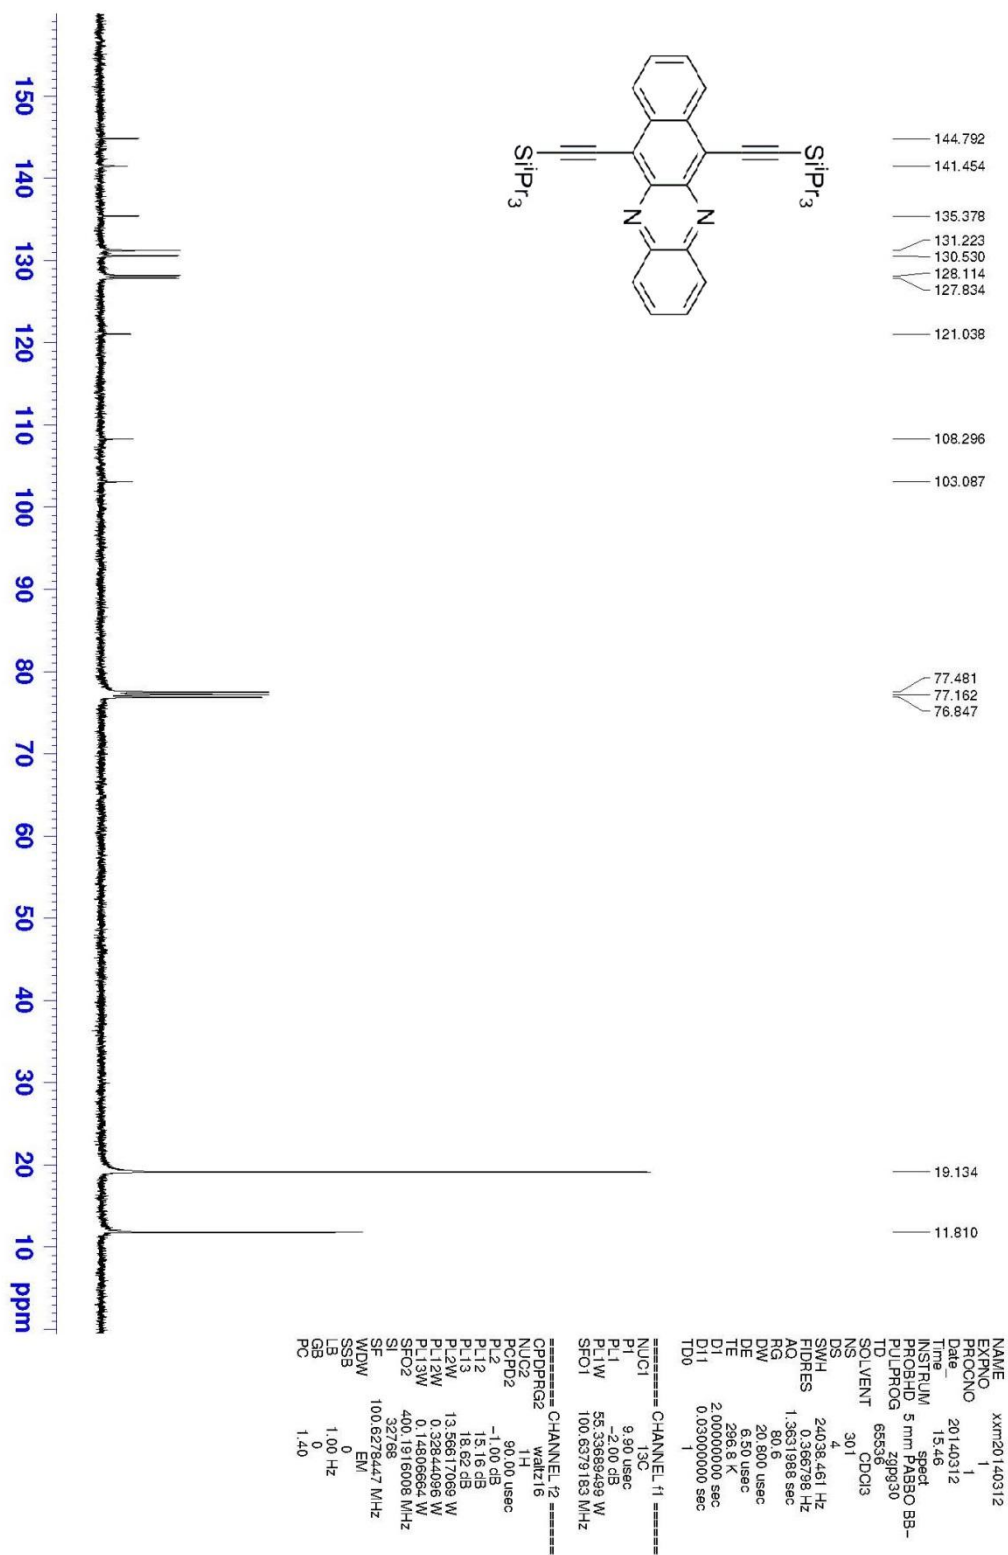

<sup>13</sup>C NMR spectrum of **1a**

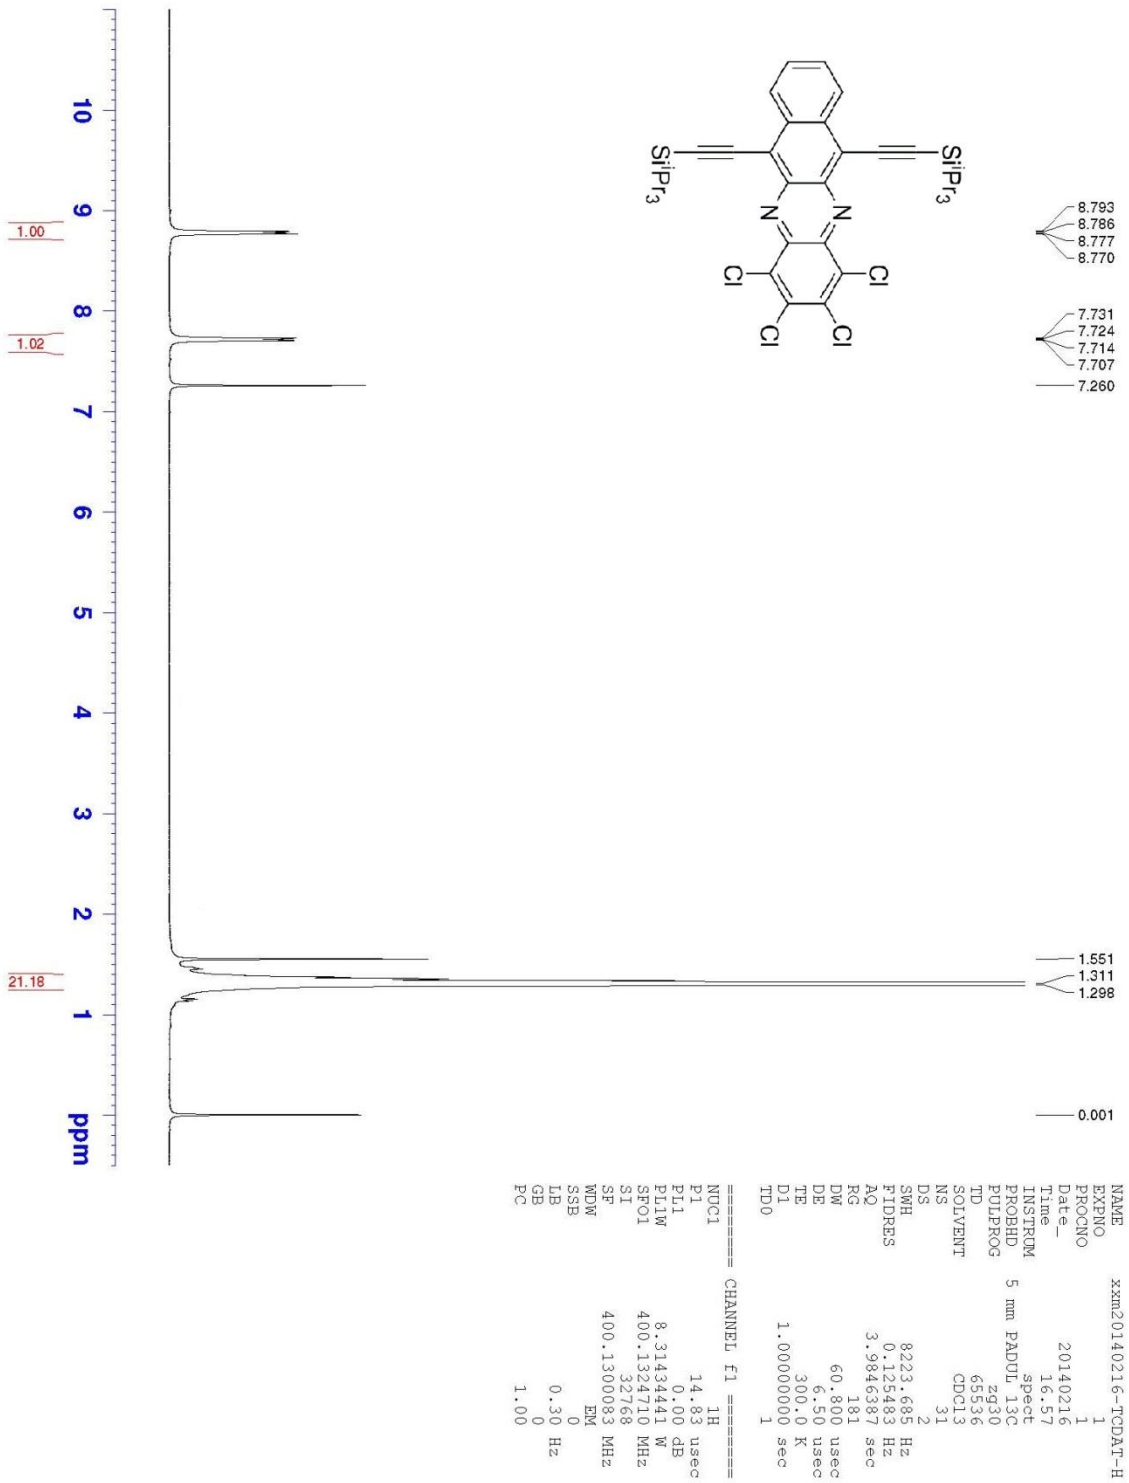

<sup>1</sup>H NMR spectrum of **1b**

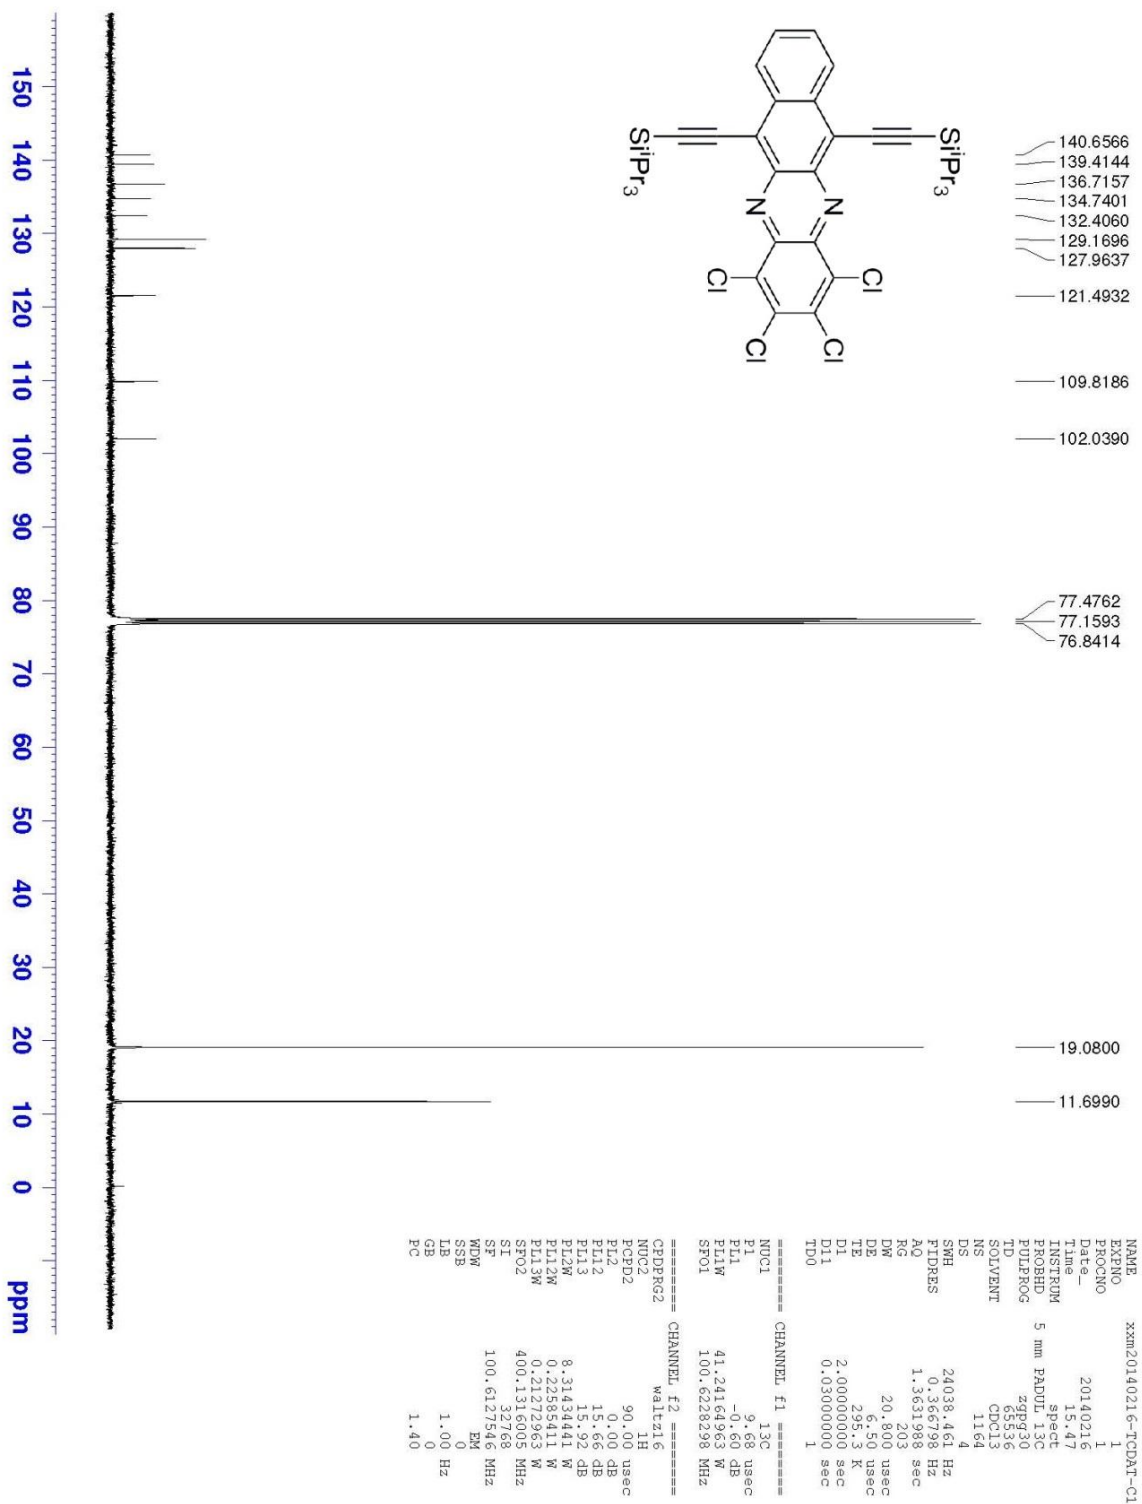

<sup>13</sup>C NMR spectrum of **1b**
